# Supplementary material for: Annexin A1 Is Associated with Adverse Clinical Outcomes in Patients with COVID-19
Source: MDPI journal article supplement (doi:10.3390/jcm11247486), 2022-12-17
Supplement: s1 [file s1]

## SUPPLEMENTALS

**Table S1.** Median AnxA1 (interquartile range) of moderate and severe patients with COVID-19 during the course of disease. AnxA1 did not significantly change over time between moderate and severe patients.

|              |          | Moderate            |  | Severe              |  | p-value |
|--------------|----------|---------------------|--|---------------------|--|---------|
| AnxA1, ng/mL | <i>n</i> | <i>median (IQR)</i> |  | <i>median (IQR)</i> |  |         |
| Baseline     | 68       | 30.1 (16.0-42.0)    |  | 28.9 (17.3-53.6)    |  | 0.583   |
| ≤ 7 days     | 31       | 27.3 (13.8-49.9)    |  | 39.1 (23.4-60.3)    |  | 0.102   |
| 8 – 14 days  | 9        | 37.5 (32.0-55.2)    |  | 39.6 (27.4-64.8)    |  | 0.891   |

Differences between groups were analyzed by the Mann Whitney U test.

Abbreviation: AnxA1, Annexin A1.

**Table S2.** Baseline characteristics of patients with normal and elevated AnxA1.

|                         | Normal Range | Normal AnxA1<br>( <i>n</i> =135) | Elevated AnxA1<br>( <i>n</i> =85) | Overall <i>P</i> |
|-------------------------|--------------|----------------------------------|-----------------------------------|------------------|
| M/F                     |              | 90/45                            | 54/31                             | 0.634            |
| Age, yr.                |              | 67 (±14)                         | 70 (±12)                          | 0.098            |
| Days from illness onset |              | 7 (5-10)                         | 9 (7-14)                          | <b>&lt;0.001</b> |
| Vitals                  |              |                                  |                                   |                  |
| SBP, mmHg               |              | 132 (±21)                        | 142 (±23)                         | <b>&lt;0.001</b> |
| DBP, mmHg               |              | 79 (±13)                         | 81 (±13)                          | 0.305            |
| Heart rate, bpm         |              | 90 (80-103)                      | 86 (77-100)                       | 0.095            |
| Body temperature, °C    | ≤37.9        | 38.0 (±1.0)                      | 38.0 (±1.0)                       | 0.818            |
| Fever, n (%)            |              | 69 (55)                          | 37 (49)                           | 0.002            |
| Medical history         |              |                                  |                                   |                  |
| Hypertension, n (%)     |              | 48 (36)                          | 28 (33)                           | 0.691            |
| Diabetes, n (%)         |              | 26 (19)                          | 21 (25)                           | 0.337            |
| CVA, n (%)              |              | 17 (13)                          | 13 (15)                           | 0.570            |
| Cardiac disease, n (%)  |              | 44 (33)                          | 24 (28)                           | 0.496            |
| COPD/asthma, n (%)      |              | 20 (15)                          | 13 (15)                           | 0.923            |
| None, n (%)             |              | 31 (23)                          | 23 (27)                           | 0.492            |
| Disease severity        |              |                                  |                                   |                  |
| Mild, n (%)             |              | 37 (27)                          | 11 (13)                           | <b>0.011</b>     |
| Moderate, n (%)         |              | 40 (30)                          | 28 (33)                           | 0.605            |
| Severe, n (%)           |              | 58 (43)                          | 46 (54)                           | 0.107            |

Continuous variables were presented as mean (±standard deviation) or median (interquartile range) as appropriate. Differences between groups were analyzed by the unpaired sample *t* test or Mann Whitney U test. Differences in categorical variables were analyzed by the chi square test.

Abbreviation: AnxA1, Annexin A1. SBP, systolic blood pressure. DBP, diastolic blood pressure. CVA, cerebrovascular accident. COPD, chronic obstructive pulmonary disease.

**Table S3.** Correlations between AnxA1 and inflammatory markers and vWF:Ag at baseline in patients with COVID-19.

|                                        | <b>AnxA1 (ng/mL)</b> |                  |
|----------------------------------------|----------------------|------------------|
|                                        | Spearman's <i>r</i>  | <i>P</i> value   |
| <b>CRP (mg/L)</b>                      | 0.227                | <b>0.001</b>     |
| <b>Leukocytes (×10<sup>9</sup>/L)</b>  | 0.309                | <b>&lt;0.001</b> |
| <b>Neutrophils (x10<sup>9</sup>/L)</b> | 0.297                | <b>&lt;0.001</b> |
| <b>Lymphocytes (x10<sup>9</sup>/L)</b> | 0.160                | <b>0.026</b>     |
| <b>NLR</b>                             | 0.082                | 0.457            |
| <b>C5a (ng/mL)</b>                     | 0.190                | <b>0.008</b>     |
| <b>vWF:Ag (%)</b>                      | 0.315                | <b>&lt;0.001</b> |

Spearman rank correlation coefficients were used.

Abbreviation: AnxA1, Annexin A1. CRP, C-reactive protein. NLR, neutrophil-lymphocyte ratio. C5a, complement 5a. vWF:Ag, von Willebrand factor antigen.

**Table S4.** Univariable regression models for predictors of thrombotic events, ICU admission, and 28 days mortality in patients with COVID-19.

**Thrombotic events.** Male sex and the risk for developing a thrombotic event during the course of COVID-19 (OR 4.867 [95% CI 1.415-16.733];  $p < 0.012$ ).

**ICU Admission.** Sex (male) (OR 2.163 [95% CI 1.117-4.189];  $p = 0.022$ ), CRP (mg/L) (OR 1.008 [95% CI 1.005-1.012];  $p < 0.0001$ ) and hypertension (OR 0.462 [95% CI 0.239-0.895];  $p = 0.022$ ) and cardiac disease (OR 0.455 [95% CI 0.228-0.907];  $p = 0.025$ ) as comorbidities were risk factors for ICU admission in patients with COVID-19.

**28 days mortality.** Sex (male) (OR 2.056 [95% CI 1.023-4.131];  $p = 0.043$ ), CRP (mg/L) (OR 1.004 [95% CI 1.001-1.008];  $p = 0.015$ ) and diabetes as comorbidity (OR 3.551 [95% CI 1.771-7.120];  $p < 0.0001$ ) were risk factors for 28 days in-hospital mortality in patients with COVID-19.

**Table S5.** Linear mixed models calculated mean predicted AnxA1 levels at baseline and over time for thrombotic events, ICU admission and 28 days in-hospital survival.

| <b>AnxA1</b>             |                          |              |
|--------------------------|--------------------------|--------------|
| <b>Thrombotic events</b> | <i>Estimate (95% CI)</i> | p-value      |
| Thrombosis               | + 27.8 (-2.7-58.3)       | 0.074        |
| Over time                | + 5.4 (0.1-10.7)         | <b>0.048</b> |
| Thrombosis*Over time     | - 3.2 (-13.6-7.2)        | 0.537        |
| <b>ICU admission</b>     | <i>Estimate (95% CI)</i> | p-value      |
| ICU admitted             | + 20.5 (-2.6-43.5)       | 0.082        |
| Over time                | + 2.8 (-5.0-10.5)        | 0.480        |
| ICU admitted*Over time   | + 2.1 (-7.6-11.7)        | 0.670        |
| <b>28 Days Mortality</b> | <i>Estimate (95% CI)</i> | p-value      |
| Non-survivors            | + 7.7 (-17.9-33.3)       | 0.553        |
| Over time                | + 5.0 (-0.1-10.2)        | 0.056        |
| Non-survivors*Over time  | - 1.4 (-12.4-9.7)        | 0.806        |

Abbreviation: AnxA1, Annexin A1. ICU, intensive care unit.
